# Supplementary material
Source: Royal Society of Chemistry journal article supplement (doi:10.1039/d6nr00990e)
Supplement: d6nr00990e2.pdf [file d6nr00990e2.pdf]

## Supporting Information

For

### **Overcoming Silk Fibroin Electrospinning Limitations: Ultra-High Surface Area Nanofibers and Microfilms Through Ethyl Cellulose-Assisted High-Speed Spinning**

Qiangjun Hao,<sup>1,2</sup> Kai Xu,<sup>2</sup> Tyler Davide,<sup>1</sup> Jared Lugo,<sup>1</sup> Nagireddy Poluri,<sup>2</sup> Xiao Hu,<sup>3</sup> Hanying Bai,<sup>1</sup> Cheng Zhang,<sup>1,\*</sup> and Ping Lu<sup>1,2,\*</sup>

<sup>1</sup> Chemistry Department, Long Island University (Post), Brookville, NY 11548, United States

<sup>2</sup> Department of Chemistry and Biochemistry, Rowan University, Glassboro, New Jersey 08028, United States

<sup>3</sup> Department of Physics and Astronomy, Rowan University, Glassboro, NJ 08028, USA

\*Address correspondence to [cheng.zhang@liu.edu](mailto:cheng.zhang@liu.edu) (C. Zhang) and [ping.lu@liu.edu](mailto:ping.lu@liu.edu) (P. Lu).

Number of pages: 6

Number of figures: 4

Number of movies: 1

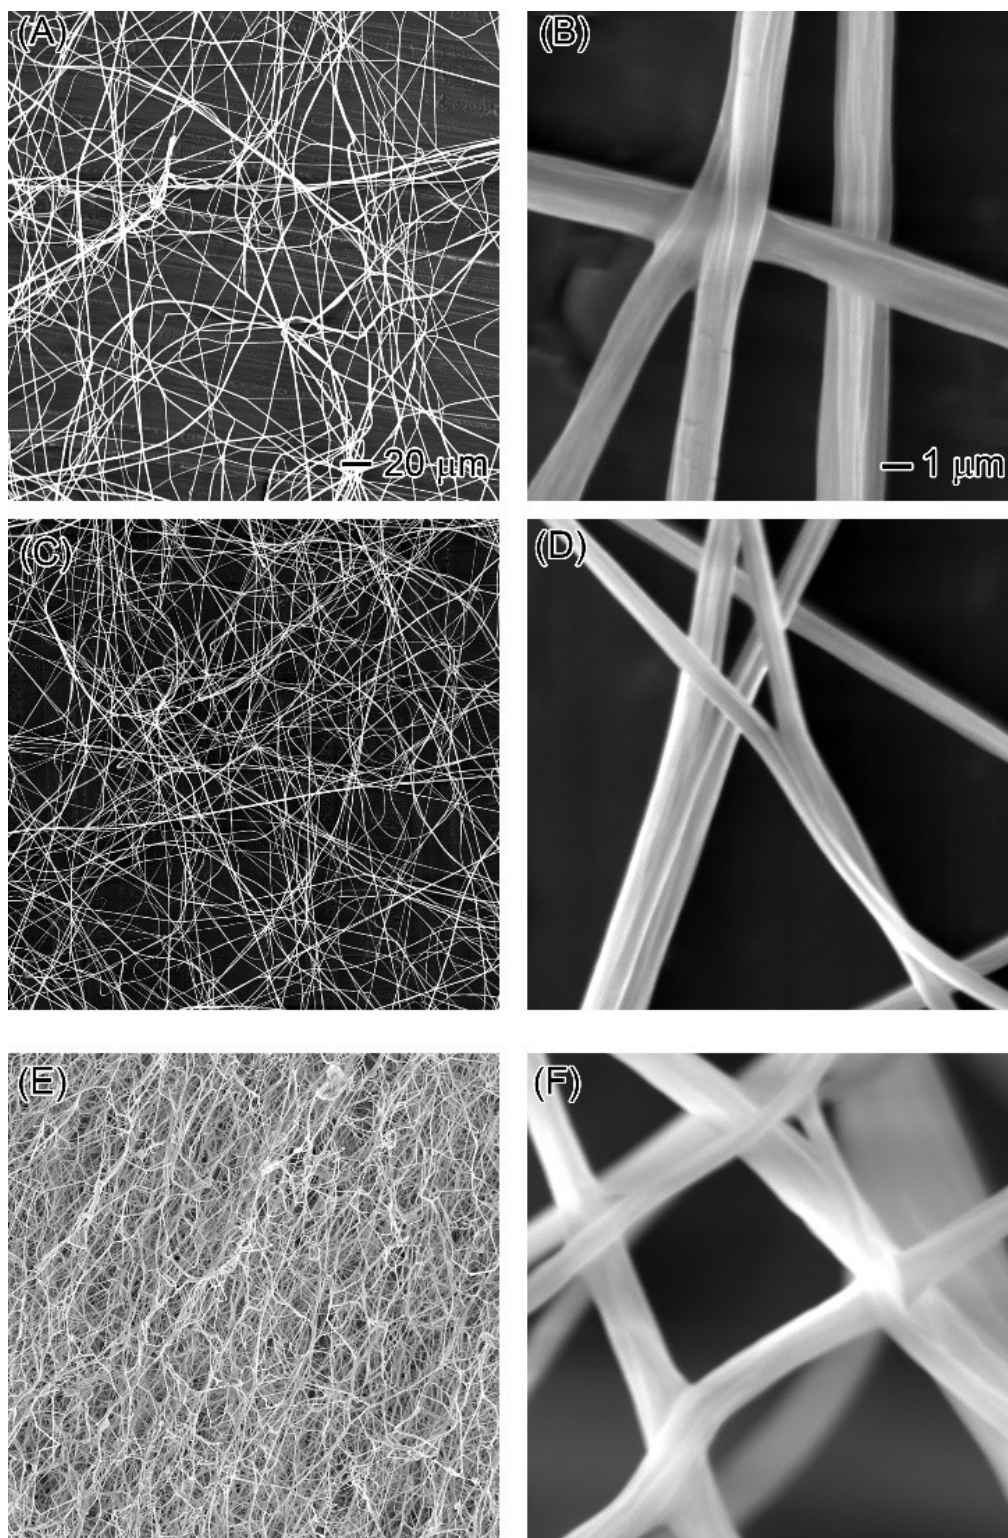

**Figure S1.** SEM images showing the morphology of EC-SF fibers at various concentrations of  $\text{CaCl}_2$ : (A) 13%, (B) 26%, and (C) 52%. The scale bars in (A) and (B) also apply to the corresponding images in the same column.

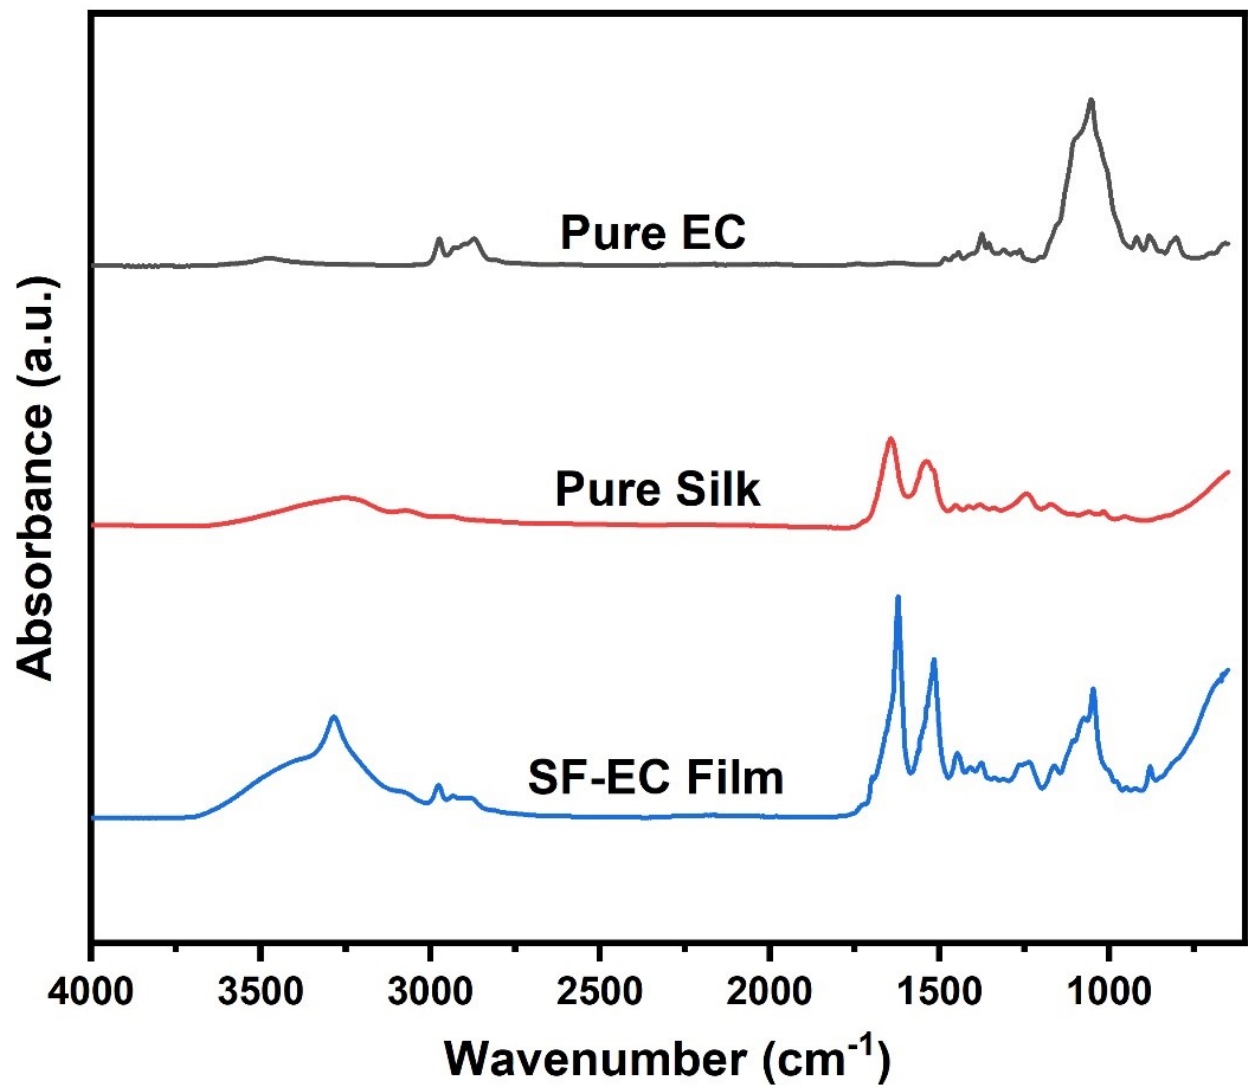

Figure S2. FTIR spectra of pure EC, pure silk, and EC-SF film.

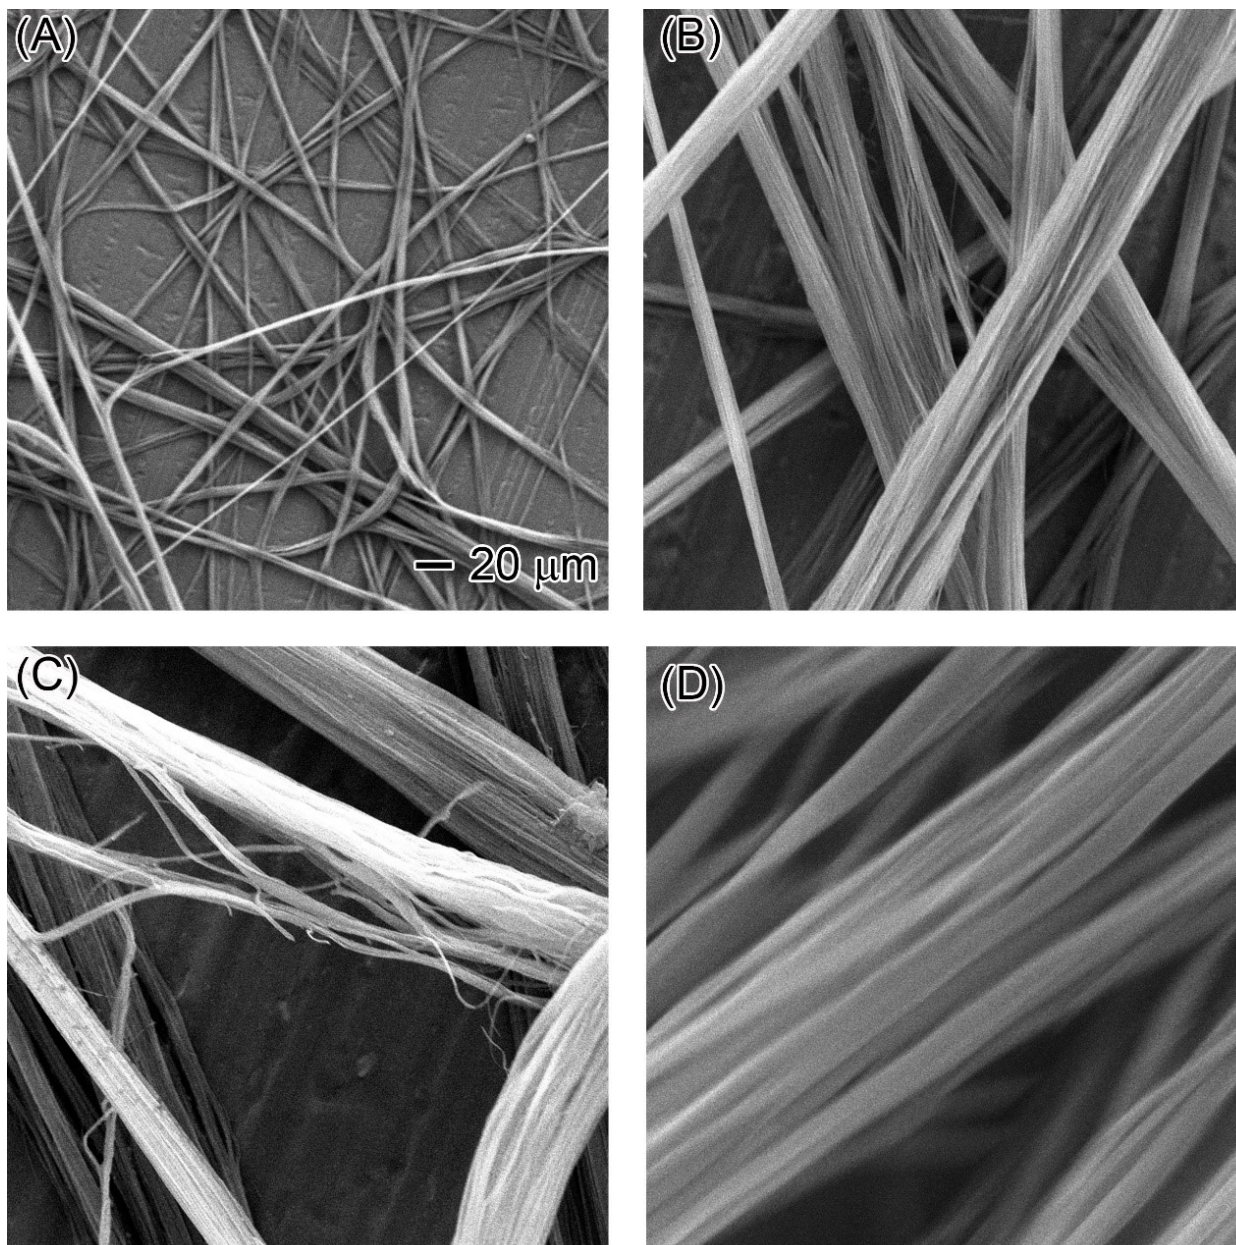

**Figure S3.** SEM images showing the morphology of SF nanofibers obtained after ethanol hot-steam treatment of EC-SF fibers.

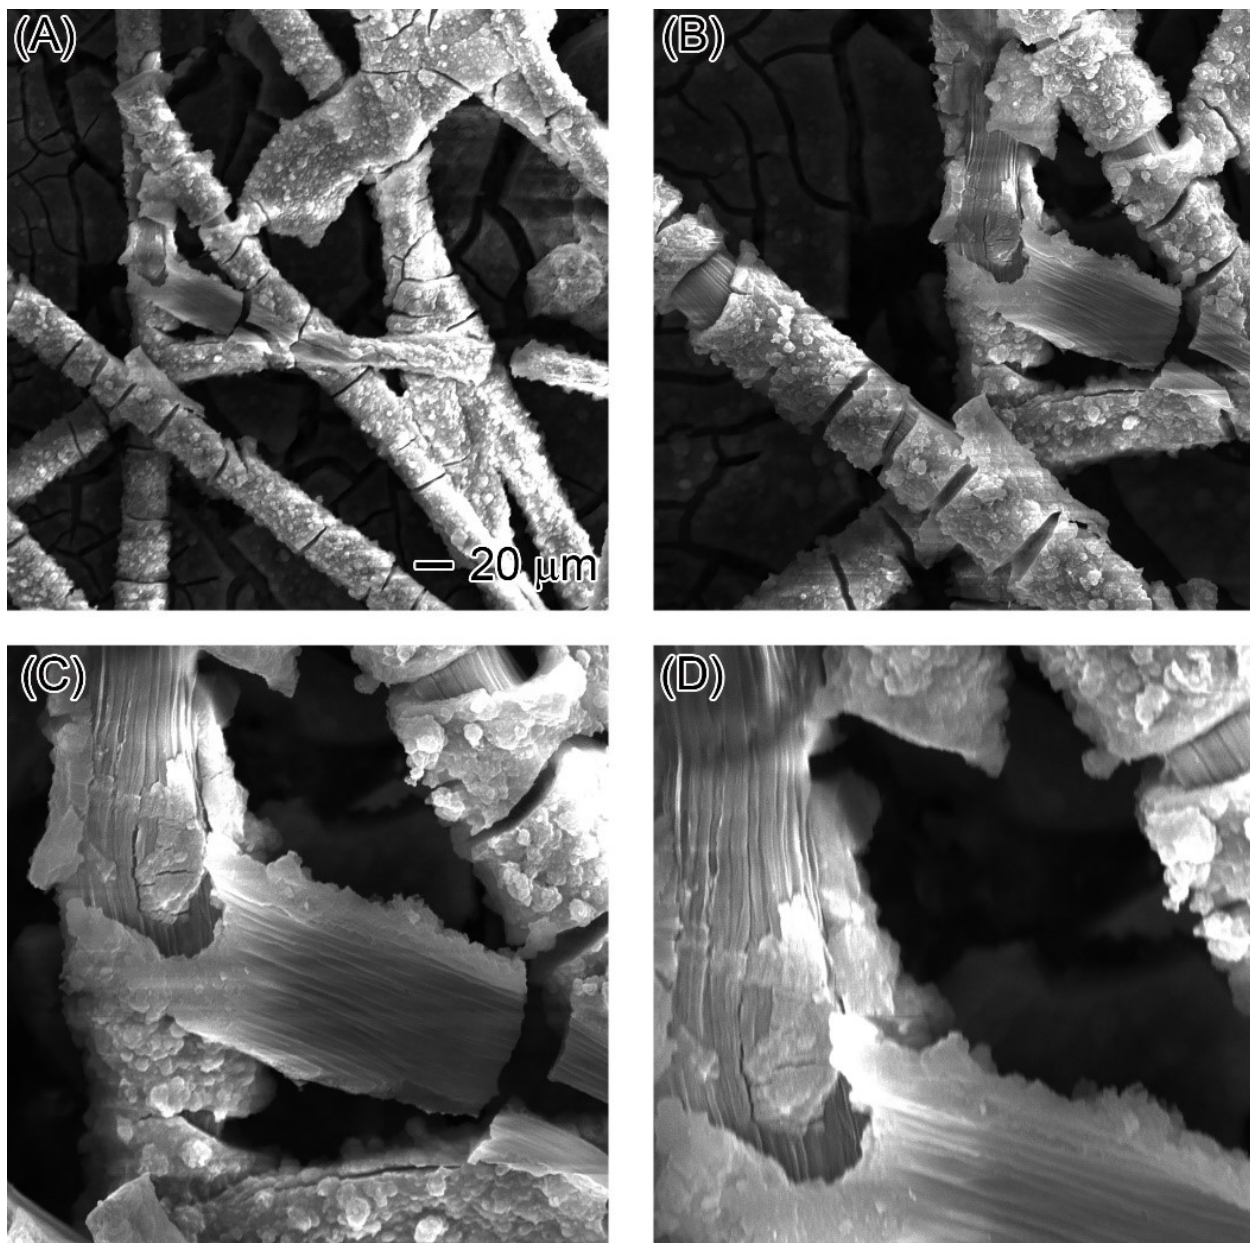

**Figure S4.** SEM images showing the morphology of SF nanofibers obtained after treating EC-SF fibers with insufficient ethanol. The scale bar in (A) also applies to other images.

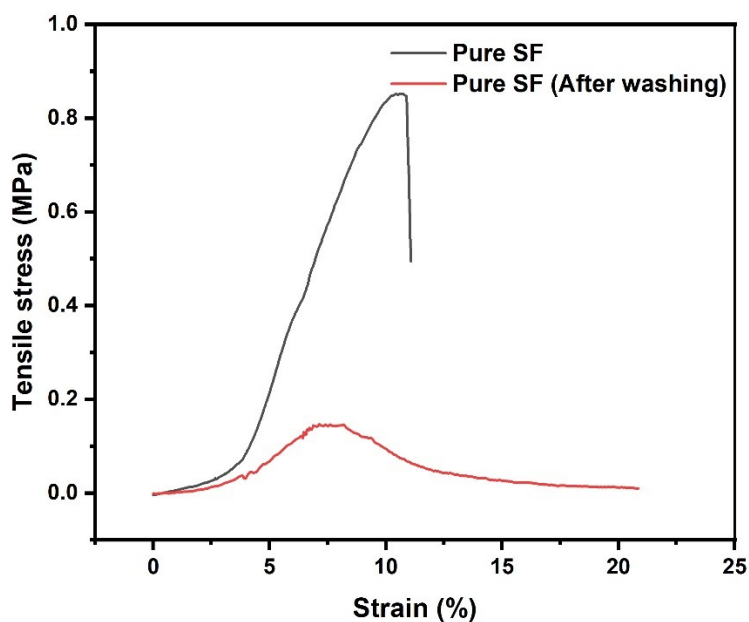

**Figure S5.** Tensile stress–strain curves of pure SF fibrous membranes before and after washing, showing that washing markedly reduced the tensile strength and mechanical integrity of the SF fiber network.

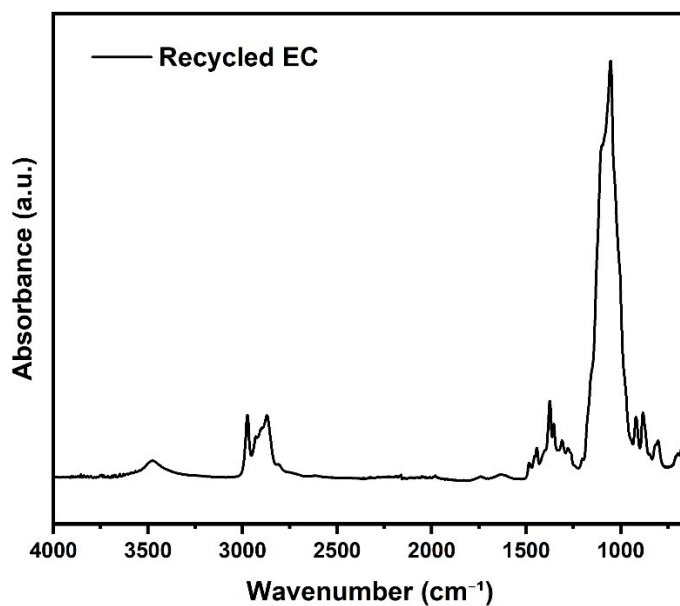

**Figure S6.** FTIR spectrum of recycled EC, confirming the retention of characteristic EC functional groups after recycling.

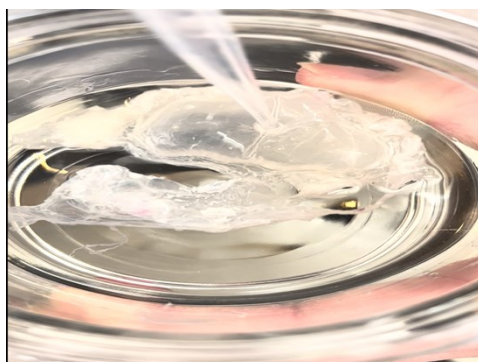

**Movie S1.** Dissolution of EC-SF composite fibers in 60% ethanol, forming EC-SF microfilms.
